# Supplementary material for: CTLA-4 blockade and interferon-α induce proinflammatory transcriptional changes in the tumor immune landscape that correlate with pathologic response in melanoma
Source: PubMed Central journal article supplement (PMC7799833; doi:10.1371/journal.pone.0245287), 2021-01-11
Supplement: pone.0245287.s007.pdf [file pone.0245287.s007.pdf]

S2 Table. Patient Demographics and Baseline Disease Characteristics of patients enrolled in clinical trial (N=30 patients)\*

| Variable                              |                    | No. of Patients (%) |
|---------------------------------------|--------------------|---------------------|
| Age (years); Median (range)           |                    | 61 (37-76)          |
| Cutaneous primary                     |                    | 21 (70)             |
| Unknown primary                       |                    | 8 (27)              |
| Mucosal                               |                    | 1 (3)               |
| Gender                                | Female             | 12 (40)             |
|                                       | Male               | 18 (60)             |
| Performance Status                    | 0                  | 16 (53)             |
|                                       | 1                  | 14 (47)             |
|                                       | BRAF mutation (+)  | 8 (27)              |
|                                       | BRAF wild type     | 13 (43)             |
|                                       | Unknown            | 9 (30)              |
| Recurrent disease after prior surgery |                    | 15 (50)             |
| Presence of in-transit metastases     |                    | 16 (53)             |
| Prior adjuvant HDI                    |                    | 5 (17)              |
| Estimated risk Stage                  | IIIB               | 3 (10)              |
|                                       | IIIC               | 25 (83)             |
|                                       | *IV (Not eligible) | 2 (7)               |

HDI: High-dose interferon-a; ECOG: Eastern Cooperative Oncology Group
